# Supplementary material
Source: PubMed Central journal article supplement (PMC7066684)
Supplement: ONCO-25-218-s002.pdf [file ONCO-25-218-s002.pdf]

Supplemental Table for:

From somatic variants towards precision oncology: an investigation of reporting practice for NGS-based ctDNA analysis

Jinming Li et al.

**Supplemental Table S1. Primers used in preparation of DNA fragments by site-directed mutagenesis**

| <b>Primers to amplify specific genes</b>                    |                                               |                                              |
|-------------------------------------------------------------|-----------------------------------------------|----------------------------------------------|
| <b>Mutations</b>                                            | <b>Forward Gene Specific Primer (5' - 3')</b> | <b>Reverse Gene Specific Primer (5' -3')</b> |
| NM_000546.5 (TP53):<br>c.742C>G (p.Arg248Gly)               | TTTGCGTGTGGAGTATTTGGA                         | ACTTACGACGAGTTTATCAGGAAG                     |
| NM_005228.3(EGFR):<br>c.2235_2249del15 (p.Glu746_Ala750del) | CTACCAACTTCTGTCAAGCTCTGTAG                    | ACTTGCTATGTATTCTGTGGGTTAGAC                  |
| NM_005228.3(EGFR):<br>c.2369C>T (p.Thr790Met)               | CACAGCACAGAGAGACCACT                          | GCAACGGCGTATTCTCAGAGAC                       |
| NM_005228.3(EGFR):<br>c.2390G>C (p.Cys797Ser)               | CACAGCACAGAGAGACCACT                          | GCAACGGCGTATTCTCAGAGAC                       |
| <b>Primers used for site-directed mutagenesis</b>           |                                               |                                              |
| <b>Mutations</b>                                            | <b>Forward Mutagenic Primer (5' - 3')</b>     | <b>Reverse Mutagenic Primer (5' -3')</b>     |
| NM_000546.5 (TP53):<br>c.742C>G (p.Arg248Gly)               | GCATGAAC $\square$ GGAGGCC                    | GGCCTCC $\square$ GTTTCATGC                  |

NM\_005228.3(EGFR):

c.2235\_2249del15 (p.Glu746\_Ala750del)

CTATCAACAACATCTCCGAAAGCCAACA

GGAGATGTTGTTGATAGCGACGGGAATTTTA

NM\_005228.3(EGFR):

c.2369C>T (p.Thr790Met)

TCATCA**T**GCAGCTCATGCCC

AAGGGCATGAGCTGC**A**TGATG

NM\_005228.3(EGFR):

c.2390G>C (p.Cys797Ser)

CTTCGGCT**C**CCTCCTGGACTA

AGTCCAGGAGG**G**AGCCGAAG

---

**Substituted bases are bold and framed.**
